# Supplementary material for: RNA-sequencing analysis of lung primary fibroblast response to eosinophil-degranulation products predicts downstream effects on inflammation, tissue remodeling and lipid metabolism
Source: Springer Nature journal article supplement (doi:10.1186/s12931-017-0669-8), 2017-11-10
Supplement: MOESM3 [file 15213642]

**Table E2.** Genes (169) up regulated by >1.5 fold in both fibroblasts lines (L20 and L21) cultured with IL3IgG eosinophil conditioned media (average of 2 eosinophil donors), compared to HLF cultured in medium only, and cultured with rhIL-3 plus HA-IgG.

| Gene           | Fold change | Gene       | Fold change | Gene      | Fold change | Gene           | Fold change |
|----------------|-------------|------------|-------------|-----------|-------------|----------------|-------------|
| ADAM20         | 7.4         | ELAVL2     | 12.6        | KYNU      | 3.9         | RNA5S12        | 46.0        |
| ADH1C          | 11.0        | ENPEP      | 11.0        | LGALS9B   | 16.7        | RNA5S8         | 37.9        |
| ALDH8A1        | 11.3        | FAM124B    | 13.0        | LHX4      | 2.7         | RNF219-AS1     | 61.8        |
| ALG1L2         | 2.6         | FAM19A2    | 1.7         | LYSMD2    | 2.0         | RNU4ATAC       | 31.4        |
| APOA1          | 12.6        | FAM223B    | 13.4        | MGAT4A    | 11.1        | RTCA-AS1       | 1.9         |
| APOL3          | 2.3         | FAM43A     | 3.0         | MIR1204   | 1.7         | RTN1           | 9.2         |
| ARHGAP19-SLIT1 | 2.1         | FAM71E1    | 329.3       | MIR29C    | 76.3        | RTP4           | 3.0         |
| ARHGEF16       | 9.3         | FAR2P2     | 121.6       | MIR3153   | 149.3       | S100A14        | 821.9       |
| ATP8B4         | 3.5         | FGF10      | 16.7        | MIR3605   | 6499.1      | SACS-AS1       | 10.7        |
| BEX2           | 1.7         | FLJ22447   | 13.7        | MIR3651   | 8808.2      | SCARNA2        | 17.5        |
| BMP8B          | 12.9        | FLJ38576   | 1.7         | MIR3661   | 76.3        | SECTM1         | 2.5         |
| BST2           | 15.4        | FLRT1      | 127.9       | MIR4485   | 7474.0      | SHROOM2        | 1.7         |
| C10orf82       | 13.3        | FOXD2      | 100.5       | MIR4649   | 1.8         | SLC16A6        | 1.6         |
| C1orf204       | 1.9         | FOXD3      | 11.0        | MIR6858   | 76.3        | SLC18A2        | 7.6         |
| C1QL1          | 15.0        | FRAT1      | 14.4        | MIR6873   | 6645.2      | SLC1A3         | 175.7       |
| C1R            | 2.1         | GACAT2     | 258.4       | MIR762    | 76.3        | SLC22A14       | 59.9        |
| C2orf82        | 19.7        | GAL3ST2    | 10.4        | MYO1H     | 6.4         | SLC26A4-AS1    | 5.7         |
| C3             | 59.9        | GNG3       | 33.5        | NATD1     | 2832.6      | SLC51A         | 4.2         |
| C6orf165       | 3.0         | GPR17      | 11.0        | NBPF4     | 13.3        | SNORD12        | 37.7        |
| C8A            | 13.7        | GREM2      | 1.7         | NFKBIA    | 1.8         | SNORD38A       | 2105.4      |
| CALML6         | 17.8        | GSDMC      | 9.6         | NFKBIZ    | 2.6         | SNORD3B-1      | 1.9         |
| CCDC102B       | 2.2         | HAGLR      | 5.7         | NKPD1     | 10.5        | SNORD6         | 42.5        |
| CCL2           | 3.7         | HES1       | 14.4        | NODAL     | 11.1        | SORCS2         | 2.1         |
| CCL4L2         | 278.4       | HIST1H2BI  | 392.3       | NOXRED1   | 13.4        | SOX7           | 128.1       |
| CD177          | 2.4         | HIST2H2BE  | 2.0         | NPC1L1    | 44.2        | SPARCL1        | 14.2        |
| CFAP46         | 3.2         | HIST2H3D   | 17.7        | NPTX1     | 2.6         | SPATA6L        | 1.7         |
| CH25H          | 4.2         | IBA57-AS1  | 18.4        | NUP210    | 1.7         | SQSTM1         | 1.7         |
| CHADL          | 187.2       | ICAM1      | 3.6         | OVCH1-AS1 | 10.1        | SYNDIG1        | 19.2        |
| CIDEC          | 328.8       | IGSF6      | 21.9        | PACERR    | 12.7        | TAT-AS1        | 13.8        |
| COL4A2-AS1     | 15.4        | IL12RB1    | 11.3        | PALD1     | 8.3         | TBC1D3H        | 1.8         |
| COL4A3         | 5.4         | IL32       | 3.4         | PAPPA-AS1 | 2.0         | TM4SF19-AS1    | 1.6         |
| CPT1B          | 8.7         | IL6        | 2.3         | PARD6B    | 10.7        | TM4SF1-AS1     | 1.6         |
| CXCL1          | 1.8         | INCA1      | 1.8         | PEG3-AS1  | 2.1         | TMEM110-MUSTN1 | 10.7        |
| CXCL8          | 2114.0      | JAK3       | 151.1       | PF4V1     | 20.2        | TTC6           | 45.5        |
| CYP1A1         | 1.7         | KANK3      | 10.2        | PLXDC1    | 15.2        | TUBA8          | 1.7         |
| CYP1B1         | 839.5       | KCNIP2-AS1 | 1.9         | PP14571   | 11.3        | UCN2           | 1.7         |
| DCHS2          | 58.7        | KCNS2      | 9.5         | PRODH     | 206.1       | USP12-AS2      | 12.8        |
| DLEU1-AS1      | 18.7        | KHDC1L     | 18.2        | PTPRN2    | 15.4        | USP17L1        | 10.5        |
| DLX1           | 15.7        | KIAA2012   | 6.0         | PYHIN1    | 2.7         | VDR            | 2.2         |
| DRICH1         | 2.1         | KL         | 8.4         | RAB41     | 384.0       | VSIG10L        | 2.3         |
| EFCAB8         | 10.0        | KRT36      | 5.0         | RAB9B     | 17.0        | ZC3H12A        | 2.0         |
| EHF            | 11.9        | KRTAP1-3   | 18.6        | RELB      | 2.0         | ZMYND15        | 7.6         |
|                |             |            |             |           |             | ZNF559-ZNF177  | 36.6        |
