# Supplementary material for: RNA-sequencing analysis of lung primary fibroblast response to eosinophil-degranulation products predicts downstream effects on inflammation, tissue remodeling and lipid metabolism
Source: Springer Nature journal article supplement (doi:10.1186/s12931-017-0669-8), 2017-11-10
Supplement: MOESM4 [file 15213642]

**Table E3.** Genes (131) down regulated by >1.5 fold in both fibroblasts lines (L20 and L21) cultured with IL3IgG eosinophil conditioned media (average of 2 eosinophil donors), compared to HLF cultured in medium only, and cultured with rhIL-3 plus HA-IgG.

| Gene         | Fold change | Gene        | Fold change | Gene         | Fold change | Gene        | Fold change |
|--------------|-------------|-------------|-------------|--------------|-------------|-------------|-------------|
| ABCA13       | -10.7       | ERBB3       | -19.6       | MYOM1        | -21.6       | RRS1-AS1    | -5.2        |
| ADM5         | -27.6       | EXTL1       | -1.6        | N4BP2L2-IT2  | -14.9       | RUNDC3A-AS1 | -1.9        |
| AK8          | -17.0       | FKBP6       | -410.9      | NDUFV2-AS1   | -33.6       | SERTAD4-AS1 | -21.0       |
| ANKRD13B     | -1.6        | FLJ12825    | -2.5        | NLRC4        | -11.0       | SLC22A1     | -272.6      |
| ANKRD24      | -3.5        | FOXQ1       | -8.5        | NNAT         | -627.6      | SMIM5       | -47.5       |
| ARHGAP19     | -99.1       | GRHL1       | -2.1        | NOS1AP       | -9.9        | SNORA25     | -925.1      |
| ARHGAP31-AS1 | -8.4        | HCG17       | -44.3       | NSG1         | -45.9       | SNORA48     | -21.1       |
| ARL17A       | -3.0        | HIST1H2AK   | -315.4      | NT5C1B       | -2.0        | SNORD26     | -1652.9     |
| ARR3         | -7.2        | HIST1H2BL   | -15.2       | NTN3         | -8.3        | SNORD79     | -99.0       |
| ASB5         | -5.2        | HIST1H3G    | -48.3       | ODF3L1       | -145.9      | SNORD96A    | -5165.4     |
| ASMTL-AS1    | -2.2        | HIST1H4K    | -1.9        | PAK3         | -17.4       | SPATA1      | -10.4       |
| BMP3         | -23.6       | HLA-DPB1    | -8.7        | PILRA        | -18.8       | SPATA9      | -8.0        |
| BTBD18       | -58.0       | IMPG2       | -5.0        | PLCH2        | -6.1        | SPDYE11     | -1.6        |
| C12orf56     | -1.6        | JAKMIP2-AS1 | -15.8       | PLSCR2       | -47.8       | SPON1       | -2.1        |
| C16orf86     | -1.7        | KCNU1       | -3.5        | POC1B-GALNT4 | -63.0       | SPRY3       | -5.8        |
| C17orf104    | -1.8        | KIAA1731NL  | -16.3       | PPAPDC3      | -1.6        | SSBP3-AS1   | -47.3       |
| C1orf101     | -6.2        | KRT33A      | -540.0      | PPIAL4B      | -1.8        | TAGLN3      | -1.8        |
| C1orf132     | -4.7        | KRT33B      | -2.5        | PPIAL4F      | -2.2        | TAS1R3      | -48.5       |
| C5orf30      | -1.7        | KRTAP1-1    | -2.0        | PPL          | -5.5        | TAS2R31     | -133.3      |
| CA14         | -252.4      | KRTAP2-1    | -320.3      | PPP1R32      | -1.7        | TBC1D3K     | -7.3        |
| CCDC169      | -2.2        | KY          | -7.8        | PPP1R3G      | -9.0        | TCEAL5      | -8.0        |
| CHDH         | -213.3      | LGALSL      | -5.4        | PRKACG       | -15.8       | TLR1        | -4.6        |
| CNTN1        | -3.4        | LILRB3      | -15.8       | PRR7         | -1.7        | TMC3        | -4.1        |
| CRYGS        | -923.4      | LRGUK       | -6.5        | PRRG4        | -3.8        | TNFRSF25    | -71.8       |
| CXCR6        | -6.5        | LRRN4       | -7.3        | PTPRR        | -1.6        | TOLLIP-AS1  | -1.8        |
| DCC          | -1.8        | M1AP        | -88.0       | RAET1E       | -1.8        | TPPP3       | -2.5        |
| DDN          | -22.0       | MANEA-AS1   | -304.8      | RASSF1-AS1   | -61.0       | TRPC5       | -212.1      |
| DNAH10       | -2.4        | MAST1       | -4.8        | RIBC1        | -6.6        | WBSCR27     | -1.5        |
| DRD1         | -40.1       | MBP         | -1.8        | RNF180       | -1.9        | WWTR1-AS1   | -1.8        |
| EGR3         | -10.3       | MEX3B       | -1.9        | RNU6-36P     | -167.3      | ZASP        | -4.6        |
| EHHADH-AS1   | -1.9        | MIR221      | -106.7      | RNU6-42P     | -28.7       | ZNF540      | -33.4       |
| ELFN2        | -4.2        | MIR7110     | -11269.9    | RNU6-7       | -115.9      | ZNF575      | -2.5        |
| EPHX4        | -227.7      | MYO5C       | -2.8        | RORB         | -1.8        |             |             |
