# Supplementary material for: RNA-sequencing analysis of lung primary fibroblast response to eosinophil-degranulation products predicts downstream effects on inflammation, tissue remodeling and lipid metabolism
Source: Springer Nature journal article supplement (doi:10.1186/s12931-017-0669-8), 2017-11-10
Supplement: MOESM5 [file 15213642]

**Table E4.** Upstream Regulators of the genes listed in our dataset (target genes, Table E2 and E3) as predicted by IPA analysis.

| Upstream Regulator                        | P value of overlap                                           | Activation z-score | Target molecules in dataset                                                                                                                             |                          |
|-------------------------------------------|--------------------------------------------------------------|--------------------|---------------------------------------------------------------------------------------------------------------------------------------------------------|--------------------------|
|                                           |                                                              |                    | Genes upregulated in dataset                                                                                                                            | Genes downregulated      |
| <b>Cytokine</b>                           | Target molecules in dataset ( $\geq 10$ genes)               |                    |                                                                                                                                                         |                          |
| <b>IFNG</b>                               | $1.10 \cdot 10^{-3}$                                         | 2.803              | BST2, C1R, C3, CCL2, CH25H, CXCL1, CXCL8, EHF, ELAVL2, ICAM1, IL12RB1, IL32, IL6, JAK3, KYNU, LGALS9B, NFKBIA, NFKBIZ, RTP4, SLC1A3, SQSTM1, VDR (22)   | EGR3, FKBP6, TLR1        |
| <b>IL1A</b>                               | $7.79 \cdot 10^{-5}$                                         | 2.567              | CCL2, CXCL1, CXCL8, CYP1A1, ICAM1, IL32, IL6, NFKBIA, NFKBIZ, ZC3H12A (10)                                                                              |                          |
| <b>IL4</b>                                | $5.55 \cdot 10^{-2}$                                         | 2.275              | C3, CCL2, CXCL1, CXCL8, ICAM1, IL12RB1, IL6, JAK3, NFKBIA, SQSTM1, USP17L1, VDR (12)                                                                    | LGALS                    |
| <b>CSF2</b>                               | $6.77 \cdot 10^{-4}$                                         | 1.999              | C3, CCL2, CXCL1, CXCL8, ICAM1, IL32, IL6, NFKBIA, RELB, SQSTM1, VDR (11)                                                                                | EGR3, TLR1               |
| <b>Signaling</b>                          | Target molecules in dataset (Activation z-score $> 2.220$ )  |                    |                                                                                                                                                         |                          |
| <b>TICAM1</b>                             | $1.08 \cdot 10^{-5}$                                         | 2.417              | CCL2, CH25H, CXCL8, ICAM1, IL6, NFKBIA, NFKBIZ, RELB                                                                                                    | PILRA                    |
| <b>TRADD</b>                              | $3.08 \cdot 10^{-7}$                                         | 2.414              | CCL2, CXCL1, CXCL8, ICAM1, IL6, NFKBIA                                                                                                                  |                          |
| <b>ERK1/2</b>                             | $6.67 \cdot 10^{-2}$                                         | 2.384              | C3, CCL2, CXCL1, CXCL8, ICAM1, IL6                                                                                                                      |                          |
| <b>IKKBK</b>                              | $1.22 \cdot 10^{-5}$                                         | 2.230              | C3, CCL2, CH25H, CXCL1, CXCL8, CYP1B1, FGF10, ICAM1, IL6, RELB, LGALS9B, NFKBIA (12)                                                                    | MBP                      |
| <b>Kinase Inhibitors</b>                  | Target molecules in dataset (activation z-score $< -2.300$ ) |                    |                                                                                                                                                         |                          |
| <b>SB203580</b>                           | $2.77 \cdot 10^{-4}$                                         | -3.176             | BST2, C3, CCL2, CXCL1, CXCL8, CYP1A1, CYP1B1, EHF, ICAM1, IL6, SECTM1, VDR                                                                              |                          |
| <b>PD98059</b>                            | $2.29 \cdot 10^{-2}$                                         | -2.774             | APOA1, C3, CCL2, CXCL1, CXCL8, CYP1A1, CYP1B1, ICAM1, IL6, VDR                                                                                          | EGR3                     |
| <b>PS-1145</b>                            | $2.39 \cdot 10^{-8}$                                         | -2.418             | CCL2, CXCL1, CXCL8, ICAM1, IL6, NFKBIA                                                                                                                  |                          |
| <b>LY294002</b>                           | $4.78 \cdot 10^{-3}$                                         | -2.412             | ADH1C, CCL2, CXCL1, CXCL8, HES1, ICAM1, IL32, IL6, NFKBIA, NPTX1                                                                                        | EGR3, ERBB3              |
| <b>Transcription Factor</b>               | Target molecules in dataset (Activation z-score $> 2.200$ )  |                    |                                                                                                                                                         |                          |
| <b>CEBPA</b>                              | $6.15 \cdot 10^{-2}$                                         | 2.400              | ADH1C, C3, CXCL8, ICAM1, IL6, SECTM1, VDR                                                                                                               | PPL                      |
| <b>EGR1</b>                               | $3.12 \cdot 10^{-2}$                                         | 2.213              | APOA1, CCL2, CXCL8, ENPEP, ICAM1                                                                                                                        |                          |
| <b>Others</b>                             |                                                              |                    |                                                                                                                                                         |                          |
| <b>Lipopolysaccharide (chemical drug)</b> | $4.89 \cdot 10^{-3}$                                         | 3.591              | APOA1, C3, CCL2, CH25H, CPT1B, CXCL1, CXCL8, CYP1A1, EHF, HES1, ICAM1, IL32, IL6, IL12RB1, IGSF1, JAK3, KYNU, NFKBIA, NFKBIZ, NPTX1, RELB, SECTM1, VDR, | DDN, EGR3, SLC22A1, TLR1 |
| <b>Poly rI:rC-RNA (Biologic drug)</b>     | $7.03 \cdot 10^{-6}$                                         | 3.322              | BST2, C3, CCL2, CXCL1, CXCL8, DLX1, EHF, ELAVL2, ICAM1, IL32, IL6, LGALS9B, RELB, KYNU, NFKBIA                                                          | TLR1                     |
| <b>APP (other)</b>                        | $1.35 \cdot 10^{-2}$                                         | 3.199              | C1R, C3, CCL2, CH25H, CXCL1, CXCL8, HES1, ICAM1, IL6, KL, KYNU, NPTX1, RTP4, TUBA8                                                                      | MBP, PAK3,               |
| <b>Tretinoin (endogenous mammalian)</b>   | $2.68 \cdot 10^{-1}$                                         | 2.603              | C3, CCL2, CCL4L1, CPT1B, CXCL8, CYP1A1, FLRT1, FOXD3, HES                                                                                               | CCDC169                  |
| <b>F2 (peptidase/thrombine)</b>           | $1.15 \cdot 10^{-3}$                                         | 2.498              | CCL2, CXCL1, CXCL8, ICAM1, IL32, IL6, NFKBIA, RELB                                                                                                      | TAGLN3                   |
