# Supplementary material for: RNA-sequencing analysis of lung primary fibroblast response to eosinophil-degranulation products predicts downstream effects on inflammation, tissue remodeling and lipid metabolism
Source: Springer Nature journal article supplement (doi:10.1186/s12931-017-0669-8), 2017-11-10
Supplement: MOESM6 [file 15213642]

**Table E6.** Genes downregulated by IL3IgG- versus IL5IgG-activated eosinophil conditioned medium and control media (medium only and rhIL3IgG) in fibroblasts.

| Gene             | Protein                                                                                 | Brief description                                                                              | Regulators-Networks (IPA analyses)                                                                                                                       |
|------------------|-----------------------------------------------------------------------------------------|------------------------------------------------------------------------------------------------|----------------------------------------------------------------------------------------------------------------------------------------------------------|
| ABCA13           | ATP-binding cassette, sub-family A (ABC1), member 13                                    | Transmembrane movement                                                                         | Network 2: cellular movement (Figure E2)                                                                                                                 |
| BMP3 (secreted)  | bone morphogenetic protein 3                                                            | Bind TGF- $\beta$ receptors- Suppresses TGF- $\beta$ receptor availability                     | Network 1: development disorder (Figure E1)                                                                                                              |
| BTBD18           | BTB (POZ) domain containing 18                                                          | Protein ubiquitination                                                                         |                                                                                                                                                          |
| CA14             | carbonic anhydrase XIV                                                                  | Reversible hydration of CO <sub>2</sub>                                                        |                                                                                                                                                          |
| CAPSL            | calcyphosine-like                                                                       | Calcium ion binding                                                                            |                                                                                                                                                          |
| CCDC169          | coiled-coil domain containing 169                                                       |                                                                                                |                                                                                                                                                          |
| CHDH             | choline dehydrogenase                                                                   | Amine and ployamine biosynthesis                                                               |                                                                                                                                                          |
| DCC              | DCC netrin 1 receptor                                                                   | Axon guidance- FAK pathway- Induces apoptosis- Tumor suppressor                                |                                                                                                                                                          |
| DDN              | dendrin                                                                                 | Promote apoptosis and polymerase II activity                                                   |                                                                                                                                                          |
| DRD1             | dopamine receptor D1                                                                    | Activates cAMP/AMPK pathways- Neuronal growth                                                  |                                                                                                                                                          |
| ERBB3 (secreted) | v-erb-b2 avian erythroblastic leukemia viral oncogene homolog 3                         | Inhibits or activates neuregulin signal                                                        | Target molecule (Table 2); Regulated by OSM, Akt (Table 3); Networks: immune response (inhibitor); Network 1: development disorder, neurological disease |
| GPR3             | G protein-coupled receptor 3                                                            | Activates cAMP- APP generation                                                                 |                                                                                                                                                          |
| INAFM2           | InaF-motif containing 2                                                                 |                                                                                                |                                                                                                                                                          |
| KRT33A           | keratin 33A, type I                                                                     | Hair and nail formation                                                                        |                                                                                                                                                          |
| LGALS1           | lectin, galactoside-binding-like                                                        |                                                                                                |                                                                                                                                                          |
| MBP              | myelin basic protein                                                                    | Signaling in T-cells and neuronal cells                                                        | Target molecules (Table 2); Regulated by JUN, IKBKB, APP (Tables 3 and E3)                                                                               |
| MGAT5B           | mannosyl (alpha-1,6-)-glycoprotein beta-1,6-N-acetyl-glucosaminyltransferase, isozyme B | Neurite outgrowth by integrin interaction with ECM proteins                                    |                                                                                                                                                          |
| NLR4             | NLR family, CARD domain containing 4                                                    | Part of the inflammasome                                                                       |                                                                                                                                                          |
| NNAT             | neuronatin                                                                              | Nervous system development- Regulatory subunit of ion channels                                 |                                                                                                                                                          |
| NSG1             | neuron specific gene family member 1                                                    | Modulates amyloidogenic processing                                                             |                                                                                                                                                          |
| ODF3L1           | outer dense fiber of sperm tails 3-like 1                                               |                                                                                                |                                                                                                                                                          |
| PDE6G            | phosphodiesterase 6G, cGMP-specific, rod, gamma                                         | Regulates c-Src protein kinase and GRK2                                                        |                                                                                                                                                          |
| PLCH2            | phospholipase C, eta 2                                                                  | Formation of IP <sub>3</sub> , DAG, and the neuronal network                                   |                                                                                                                                                          |
| PLSCR2           | phospholipid scramblase 2                                                               | Role in coagulation and apoptosis                                                              |                                                                                                                                                          |
| PPIAL4F          | peptidylprolyl isomerase A (cyclophilin A)-like 4F                                      |                                                                                                |                                                                                                                                                          |
| PPL              | periplakin                                                                              | Part of Akt1-mediated signaling                                                                | Regulated by CEBPA (Table E3)                                                                                                                            |
| RAET1E           | retinoic acid early transcript 1E                                                       | Ligand for NKG2D- Role in the immune response                                                  |                                                                                                                                                          |
| RIBC1            | RIB43A domain with coiled-coils 1                                                       |                                                                                                |                                                                                                                                                          |
| SLC22A1          | solute carrier family 22 (organic cation transporter)                                   | Inhibited by PKA, activated by calmodulin complex                                              | Networks: lipid metabolism                                                                                                                               |
| SPATA1           | spermatogenesis associated 1                                                            |                                                                                                |                                                                                                                                                          |
| SPATA9           | spermatogenesis associated 9                                                            |                                                                                                |                                                                                                                                                          |
| SPON1 (secreted) | spondin 1, extracellular matrix protein                                                 | Cell adhesion- Major factor for vascular smooth muscle cell growth                             | Network 2: cellular movement                                                                                                                             |
| SPRY3            | sprouty homolog 3 (Drosophila)                                                          | Antagonist of fibroblast growth factor pathways- Negatively modulate respiratory organogenesis |                                                                                                                                                          |
| TAS2R31          | taste receptor, type 2, member 31                                                       |                                                                                                |                                                                                                                                                          |
| TLR1             | toll-like receptor 1                                                                    | Pathogen recognition and activation of innate immunity- Acts via MYD88                         | Networks: immune response. Network 1: inflammatory response                                                                                              |
| TMC3             | transmembrane channel-like 3                                                            |                                                                                                |                                                                                                                                                          |
| ZNF575           | zinc finger protein 575                                                                 |                                                                                                |                                                                                                                                                          |
