# Supplementary material for: RNA-sequencing analysis of lung primary fibroblast response to eosinophil-degranulation products predicts downstream effects on inflammation, tissue remodeling and lipid metabolism
Source: Springer Nature journal article supplement (doi:10.1186/s12931-017-0669-8), 2017-11-10

# Network 1: Inflammatory Response, Development Disorder, Neurological Disease (Score 23)

Figure E2

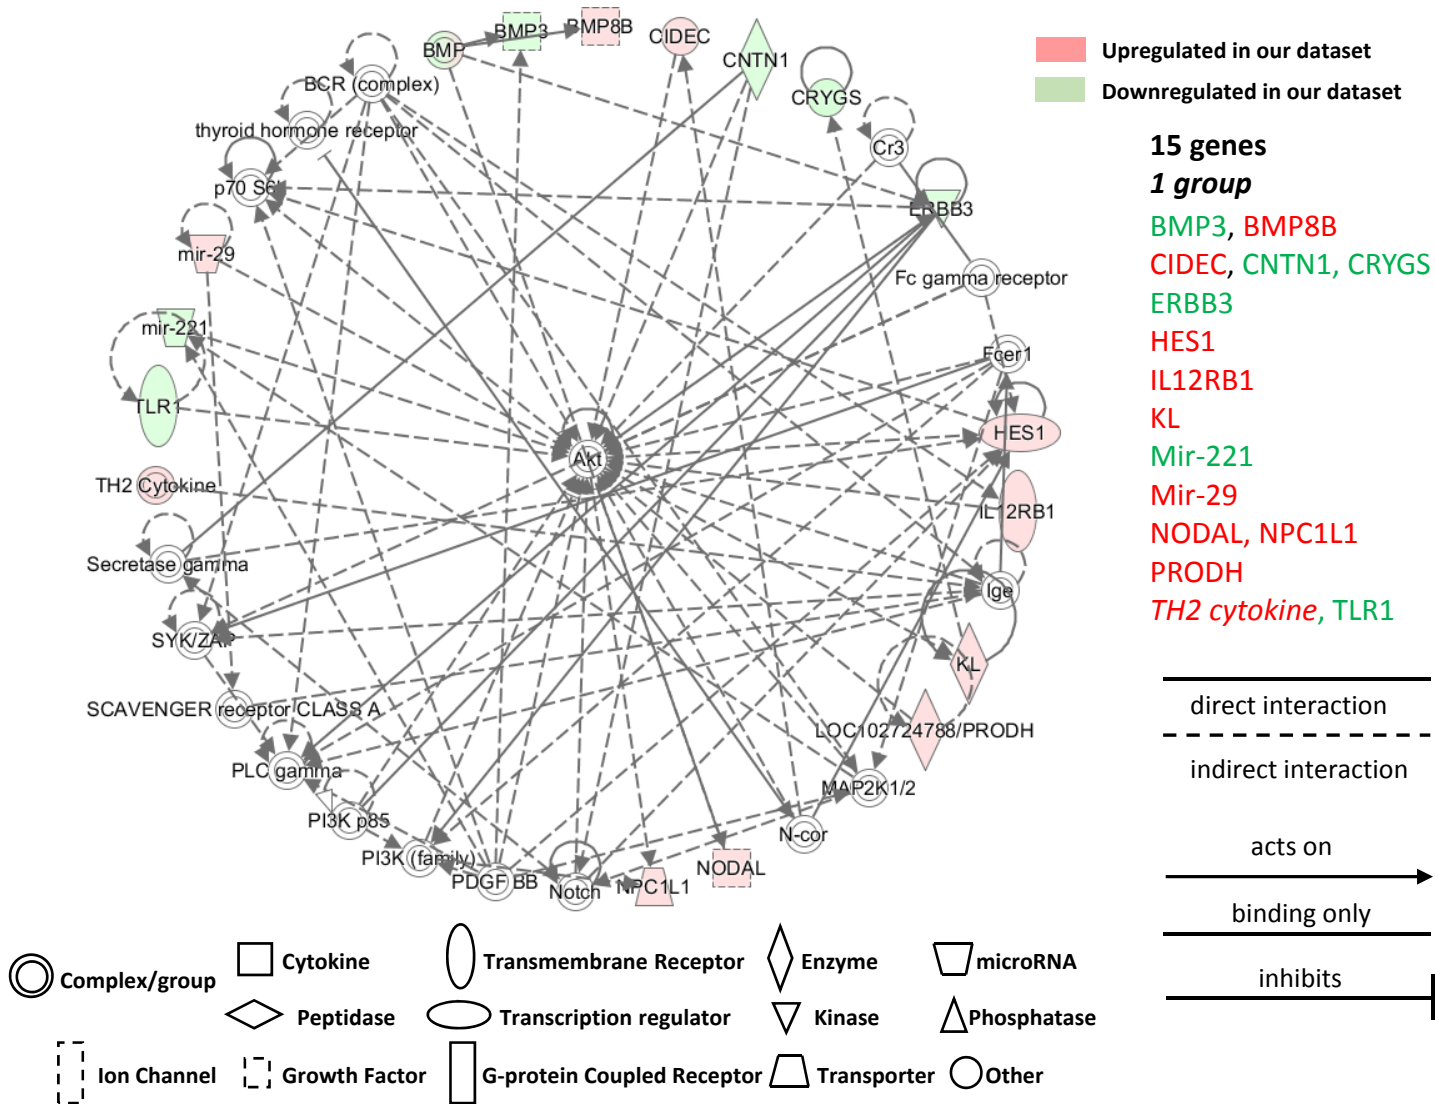

Supplement: MOESM8 [file 15213642]
