# Supplementary material for: RNA-sequencing analysis of lung primary fibroblast response to eosinophil-degranulation products predicts downstream effects on inflammation, tissue remodeling and lipid metabolism
Source: Springer Nature journal article supplement (doi:10.1186/s12931-017-0669-8), 2017-11-10

**Figure E3**

**Network 2: Cellular Movement, Hematological System Development and Function, Immune Cell Trafficking (Score 23)**

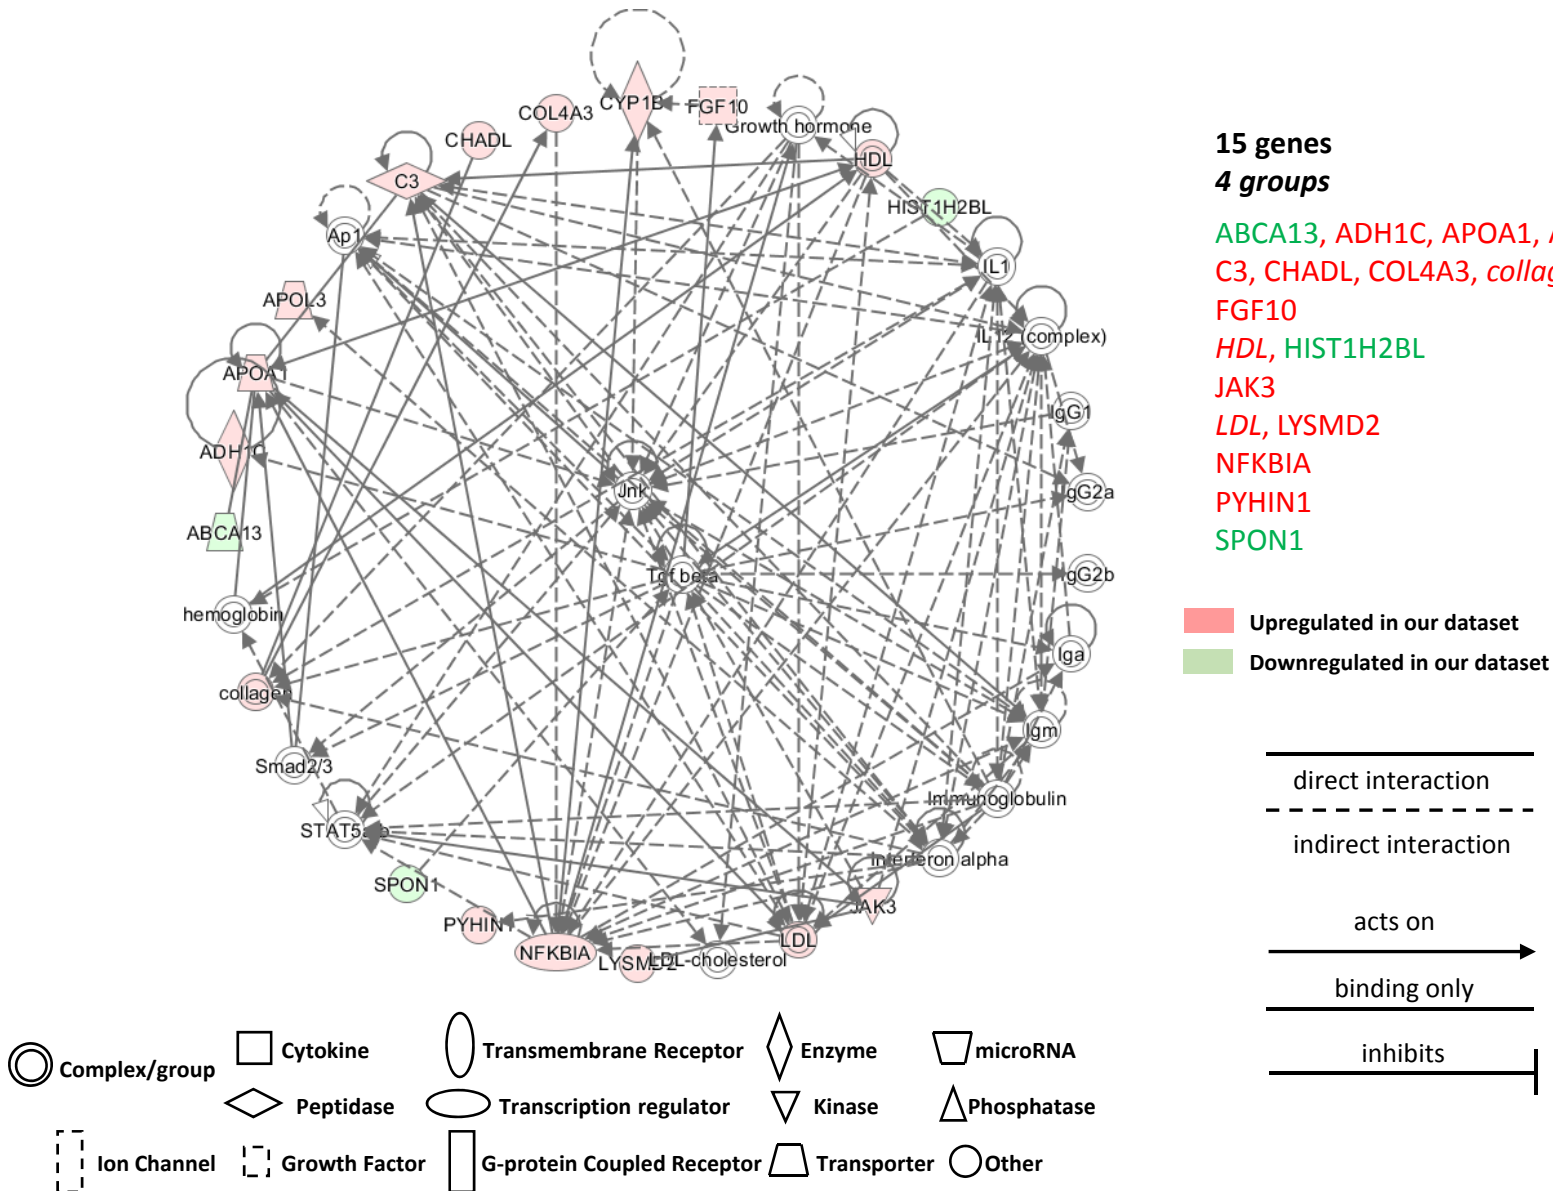

Supplement: MOESM9 [file 15213642]
