# Supplementary material for: RNA-sequencing analysis of lung primary fibroblast response to eosinophil-degranulation products predicts downstream effects on inflammation, tissue remodeling and lipid metabolism
Source: Springer Nature journal article supplement (doi:10.1186/s12931-017-0669-8), 2017-11-10
Supplement: MOESM10 [file 15213642]

**Table E7.** Association of the dataset #2 genes with Global Molecular Networks created by IPA using dataset 1 (Figures E1 and E2, and not shown)

| Global Molecular Network (IPA)                           | Genes                     |                   |
|----------------------------------------------------------|---------------------------|-------------------|
|                                                          | Upregulated               | Downregulated     |
| 1. Inflammatory Response                                 | BMP8B, CIDEA, PRODH       | BMP3, ERBB3, TLR1 |
| 2. Cellular Movement                                     | C3, CH25H, PYHIN1         | ABCA13, SPON1     |
| 3. Cell Cycle                                            | FAM124B, KRT36            | CHDH, SPRY3       |
| 4. Skeletal and Muscular System Development and Function | CXCL1, CXCL8, NFKB1, UCN2 | DCC               |
| 5. Development Disorder                                  | CH25H, CPT1B, ZC3H12A     | SLC22A1           |
| 6. Cell Morphology                                       | CYP1A1, FOXD3             | MBP               |
